# Supplementary material for: Evidence for Integrin – Venus Kinase Receptor 1 Alliance in the Ovary of Schistosoma mansoni Females Controlling Cell Survival
Source: PubMed Central journal article supplement (PMC5289644; doi:10.1371/journal.ppat.1006147), 2017-01-23
Supplement: ppat.1006147.s002.pdf [file ppat.1006147.s002.pdf]

1 **Supplementary figure S1: Structure and phylogenetic analysis of SmILK**

2 **A**

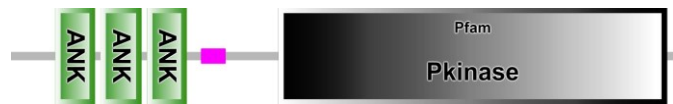

3

4 **B**

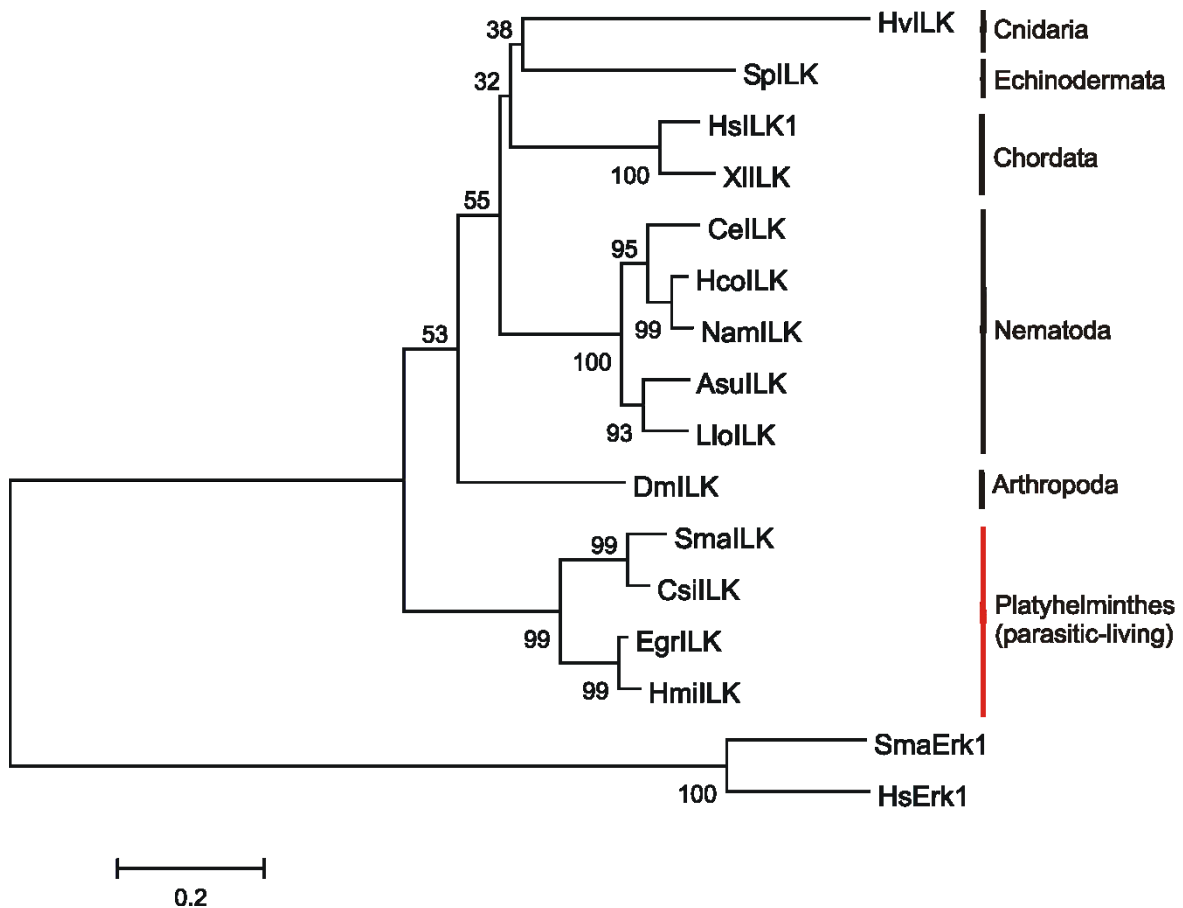

6

7

8 **Suppl. fig. S1**

9 **A**, Structure of SmILK (Smp\_079760) analysed by SMART showing three ankyrin domains  
10 (ANK) and the pseudokinase-like domain (Pkinase).

11 **B**, Phylogenetic analysis using the Neighbor-Joining method [1-4]. In addition to SmILK  
12 (SmILK) the analysis included the following 15 amino acid sequences of orthologs of  
13 organisms of different phylogenetic origins such as *Hydra vulgaris* (HvILK; Genbank accession  
14 number: XP\_002158769), *Strongylocentrotus purpuratus* (SpILK; XP\_786444), *Homo sapiens*  
15 (HsILK1; NP\_004508), *Xenopus laevis* (XIILK; NP\_001086805), *Caenorhabditis elegans* (CeILK;  
16 NP\_497139), *Haemonchus contortus* (HcoILK; CDJ97346), *Necator americanus* (NamILK;

17 ETN76257), *Ascaris suum* (AsuILK; ERG84143), *Loa loa* (LloILK; XP\_003136221), *Drosophila*  
18 *melanogaster* (DmILK; CAB77053), *Clonorchis sinensis* (CsiILK; GAA48258), *Echinococcus*  
19 *granulosus* (EgrILK; CDJ17537), *Hymenolepis microstoma* (HmiILK; CDS28855) and two amino  
20 acid sequences of the related serine/threonine kinases Erk of *Schistosoma mansoni*  
21 (SmaErk1;CCD60922 ) and *Homo sapiens* (HsErk1; NP\_002737) serving as out-group. All  
22 positions containing gaps and missing data were eliminated. In Planaria, the free-living class  
23 of the phylum platyhelminthes, no homolog was found by BLAST. Parasitic living species  
24 names were abbreviated with the first two letters, free-living with the first.

25

## 26 **References**

- 27 1. Felsenstein J. Confidence limits on phylogenies: An approach using the bootstrap.  
28 Evolution 1985;39: 783-791.
- 29 2. Saitou N, Nei M. The neighbor-joining method: A new method for reconstructing  
30 phylogenetic trees. Mol Biol Evol. 1987;4: 406-425.
- 31 3. Tamura K, Stecher G, Peterson D, Filipski A, Kumar S. MEGA6: Molecular Evolutionary  
32 Genetics Analysis version 6.0. Mol Biol Evol. 2013;30: 2725-2729.
- 33 4. Zuckerkandl E, Pauling L. Evolutionary divergence and convergence in proteins. In: Bryson  
34 V, Vogel HJ, editors. Evolving Genes and Proteins. Academic Press, New York; 1965. pp. 97-  
35 166.  
36  
37  
38
