# Supplementary material for: Evidence for Integrin – Venus Kinase Receptor 1 Alliance in the Ovary of Schistosoma mansoni Females Controlling Cell Survival
Source: PubMed Central journal article supplement (PMC5289644; doi:10.1371/journal.ppat.1006147), 2017-01-23
Supplement: ppat.1006147.s003.pdf [file ppat.1006147.s003.pdf]

1 **Supplementary figure S2: Structure and phylogenetic analysis of SmpINCH**

2 **A**

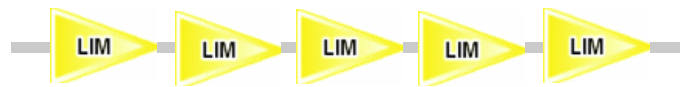

3  
4 **B**

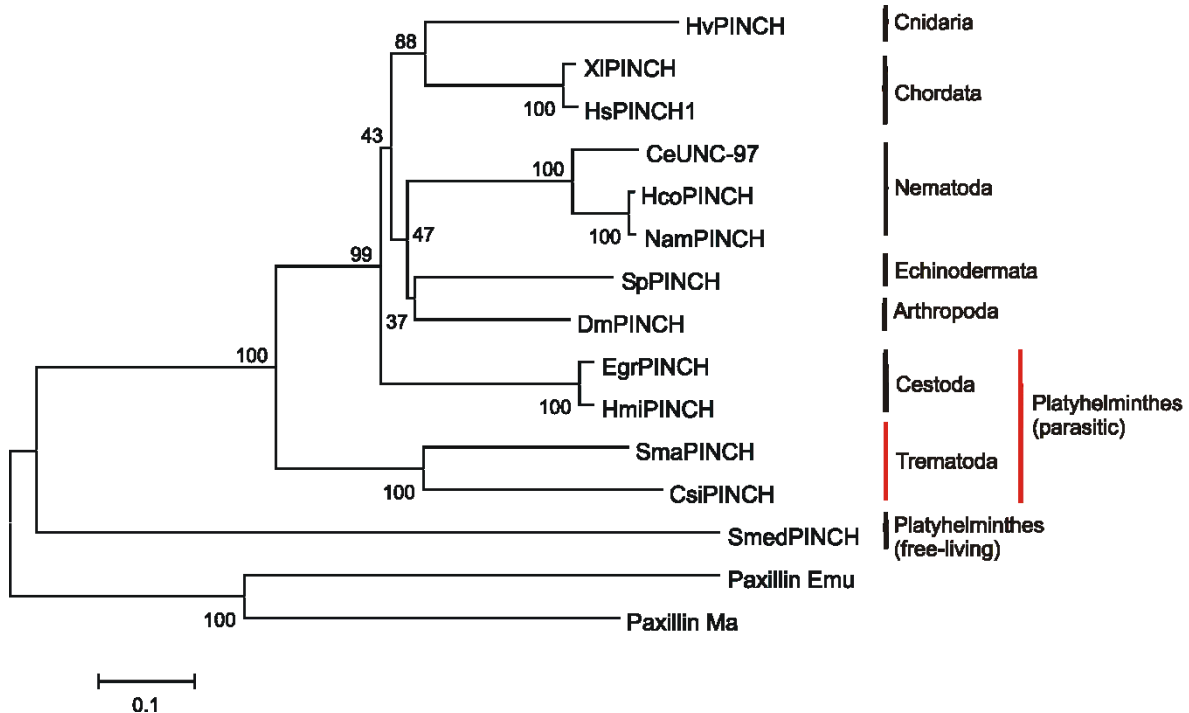

5

6

7

8 **Suppl. fig. S2**

9 **A**, Structure of SmPINCH (Smp\_020540.2) analyzed by SMART showing five LIM domains.

10 **B**, Phylogenetic analysis using the Neighbor-Joining method [1-4]. In addition to SmpINCH  
11 (SmaPINCH) the analysis involved the following 14 amino acid sequences of orthologs of  
12 organisms of different phylogenetic origins such as *Hydra vulgaris* (HvPINCH;  
13 XP\_002164622), *Xenopus laevis* (XIPINCH; ABS17667), *Homo sapiens* (HsPINCH;  
14 NP\_001180413), *Caenorhabditis elegans* (CeUNC-97; CCD83467), *Haemonchus contortus*  
15 (*HcoPINCH*; CDJ80147), *Necator americanus* (NamPINCH; ETN83005), *Strongylocentrotus*  
16 *purpuratus* (SpPINCH; XP\_793010), *Drosophila melanogaster* (DmPINCHs; NP\_731242),  
17 *Echinococcus granulosus* (EgrPINCH; EUB60965), *Hymenolepis microstoma* (HmiPINCH;  
18 CDS30700), *Clonorchis sinensis* (CsiPINCH; GAA38790), *Schmidtea mediterranea* (SmedPINCH;  
19 v31.005368) and the two amino acid sequences coding for LIM domain containing proteins of  
20 *Echinococcus multilocularis* (Paxillin Emu; CDI97526) and *Mesocricetus auratus* (Paxillin Ma;  
21 XP\_005079036) serving as out-group. All positions containing gaps and missing data were  
22 eliminated.

23 **References**

- 24 1. Felsenstein J. Confidence limits on phylogenies: An approach using the bootstrap.  
25 Evolution 1985;39: 783-791.
- 26 2. Saitou N, Nei M. The neighbor-joining method: A new method for reconstructing  
27 phylogenetic trees. Mol Biol Evol. 1987;4: 406-425.  
28
- 29 3. Tamura K, Stecher G, Peterson D, Filipowski A, Kumar S. MEGA6: Molecular Evolutionary  
30 Genetics Analysis version 6.0. Mol Biol Evol. 2013;30: 2725-2729.  
31
- 32 4. Zuckerkandl E, Pauling L. Evolutionary divergence and convergence in proteins. In: Bryson  
33 V, Vogel HJ, editors. Evolving Genes and Proteins. Academic Press, New York; 1965. pp. 97-  
34 166.  
35
