# Supplementary material for: Evidence for Integrin – Venus Kinase Receptor 1 Alliance in the Ovary of Schistosoma mansoni Females Controlling Cell Survival
Source: PubMed Central journal article supplement (PMC5289644; doi:10.1371/journal.ppat.1006147), 2017-01-23
Supplement: ppat.1006147.s004.pdf [file ppat.1006147.s004.pdf]

1 **Supplementary figure S3: Structure and phylogenetic analysis of SmNck2**

2 **A**

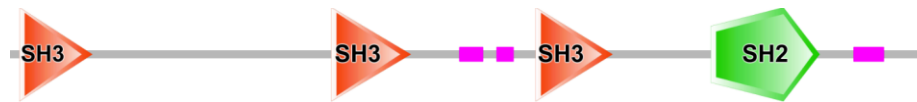

3  
4 **B**

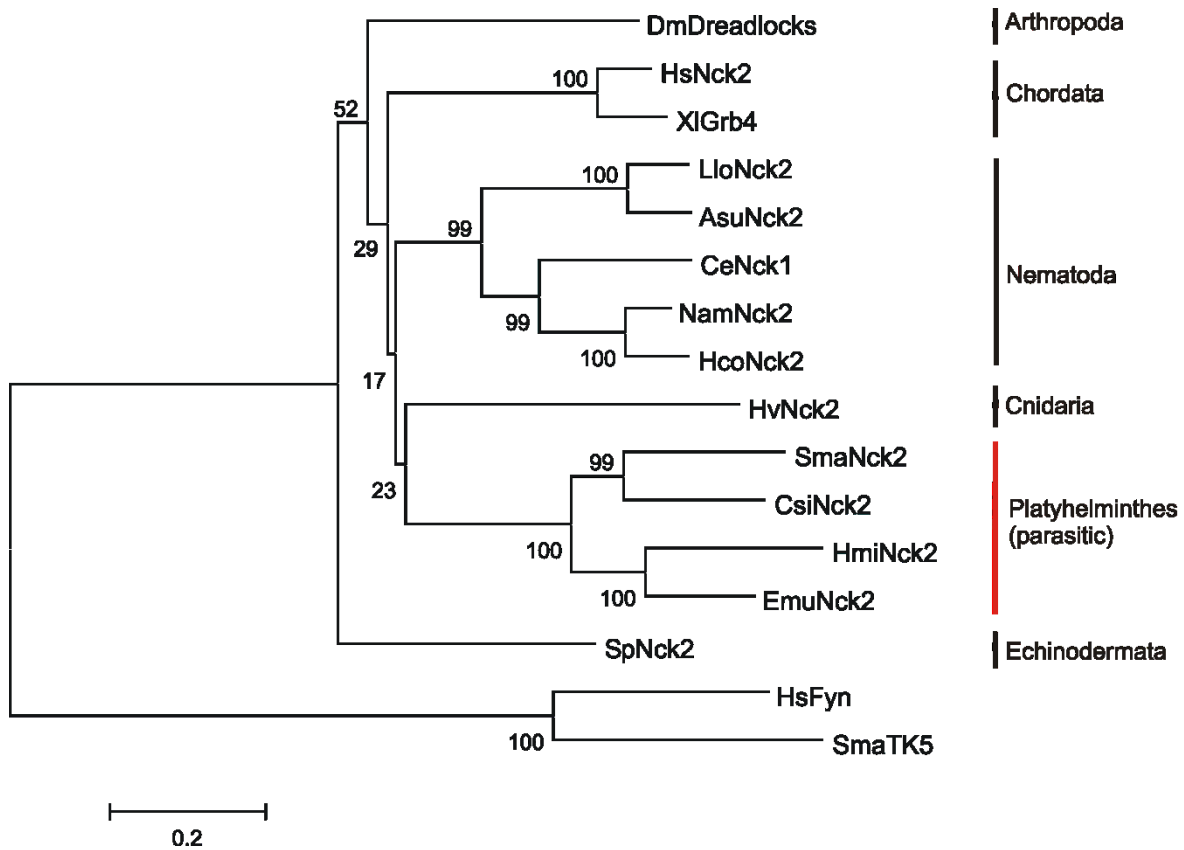

5

6 **Suppl. fig. S3**

7 **A**, Structure of SmNck2 (Smp\_014850) analyzed by SMART showing three SH3 domains (SH3)  
8 and one SH2 (SH2) domain.

9 **B**, Phylogenetic analysis using the Neighbor-Joining method [1-4]. Besides SmNck2  
10 (SmaNck2) the analysis involved the following 15 amino acid sequences of orthologs of  
11 organisms of different phylogenetic origins such as *Drosophila melanogaster* (DmDreadlocks;  
12 NP\_722657), *Homo sapiens* (HsNck2; NP\_003572), *Xenopus laevis* (XINck2; NP\_001083313),  
13 *Loa loa* (LloNck2; XP\_003137411), *Ascaris suum* (AsuNck2; ERG86028), *Caenorhabditis*  
14 *elegans* (CeNck1; NP\_508706), *Necator americanus* (NamNck2; ETN84925), *Haemonchus*  
15 *contortus* (HcoNck2; CDJ85790), *Hydra vulgaris* (HvNck2; XP\_002160090), *Clonorchis sinensis*  
16 (CsiNck2; GAA50029), *Hymenolepis microstoma* (HmiNck2; CDS31037), *Echinococcus*  
17 *multilocularis* (EmuNck2; CDJ02918), *Strongylocentrotus purpuratus* (SpNck2;  
18 XP\_011668987), and two amino acid sequences coding for SH2- and SH3-domains containing

19 proteins of *Schistosoma mansoni* (SmaTK5; AAF64151 ) and *Homo sapiens* (HsFyn; P06241)  
20 serving as out-groups. All positions containing gaps and missing data were eliminated. In  
21 Planaria, the free-living class of the phylum platyhelminthes, doing BLAST analyses, there was  
22 no homolog found. Parasite species names were abbreviated with the first two letters, free-  
23 living with the first.

24

## 25 **References**

26 1. Felsenstein J. Confidence limits on phylogenies: An approach using the bootstrap.  
27 Evolution 1985;39: 783-791.

28 2. Saitou N, Nei M. The neighbor-joining method: A new method for reconstructing  
29 phylogenetic trees. Mol Biol Evol. 1987;4: 406-425.

30

31 3. Tamura K, Stecher G, Peterson D, Filipowski A, Kumar S. MEGA6: Molecular Evolutionary  
32 Genetics Analysis version 6.0. Mol Biol Evol. 2013;30: 2725-2729.

33

34 4. Zuckerkandl E, Pauling L. Evolutionary divergence and convergence in proteins. In: Bryson  
35 V, Vogel HJ, editors. Evolving Genes and Proteins. Academic Press, New York; 1965. pp. 97-  
36 166.

37
