# Supplementary material for: Evidence for Integrin – Venus Kinase Receptor 1 Alliance in the Ovary of Schistosoma mansoni Females Controlling Cell Survival
Source: PubMed Central journal article supplement (PMC5289644; doi:10.1371/journal.ppat.1006147), 2017-01-23
Supplement: ppat.1006147.s006.pdf [file ppat.1006147.s006.pdf]

1 **Supplementary figure S5: RNAi-mediated knockdown of SmILK.**

2 **A**

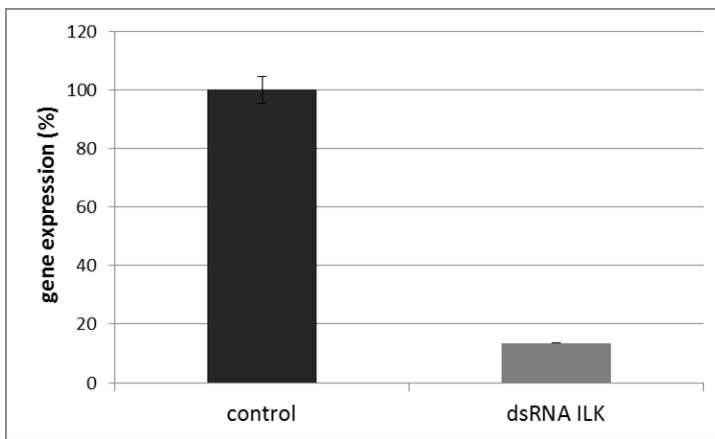

3

4 **B**

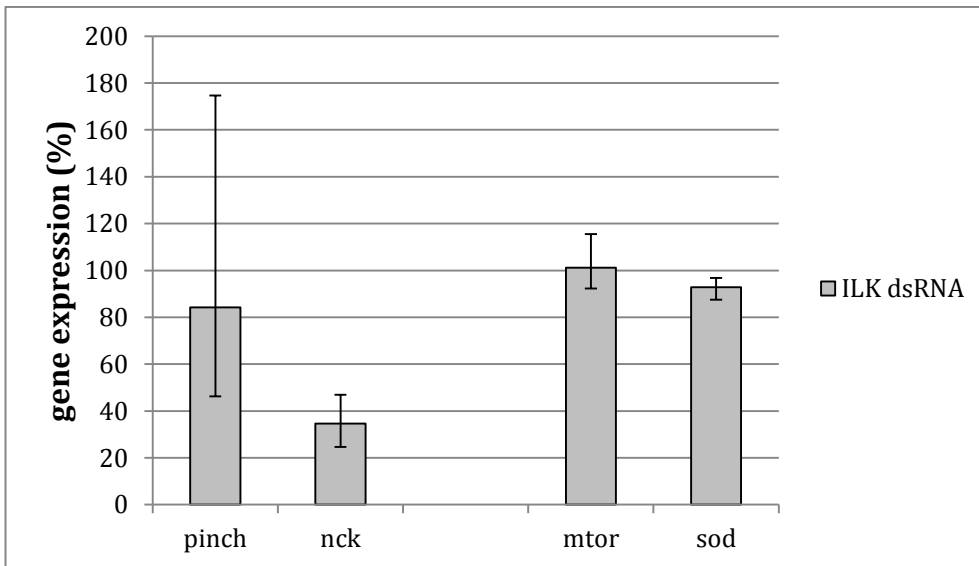

5

6

7 **Suppl. Fig. S5**

8 **A**, RNAi-mediated knockdown of SmILK in adult worms was determined by qPCR analyses  
9 ( $n = 3$ ). Using gene-specific dsRNA a reduction of SmILK transcription was achieved down to  
10 13 % of the level found in the control group (no dsRNA), 96 h after electroporation.

11 **B**, Results of the qPCR analysis ( $n = 4$ ) to investigate the transcript profiles of biologically  
12 related (SmPINCH, SmNck2 = pinch, nck, respectively) and unrelated genes (mtor,  
13 Smp\_122910, annotated as serine/threonine protein kinase mTOR; sod, Smp\_056440,  
14 annotated as superoxide dismutase) in females treated with dsRNA against ILK.
