# Supplementary material for: Evidence for Integrin – Venus Kinase Receptor 1 Alliance in the Ovary of Schistosoma mansoni Females Controlling Cell Survival
Source: PubMed Central journal article supplement (PMC5289644; doi:10.1371/journal.ppat.1006147), 2017-01-23
Supplement: ppat.1006147.s008.pdf [file ppat.1006147.s008.pdf]

1 **Supplementary figure S7: transcript profiles of the pro-apoptotic genes BAK and BAX of**  
 2 ***S. mansoni***

3 **A**

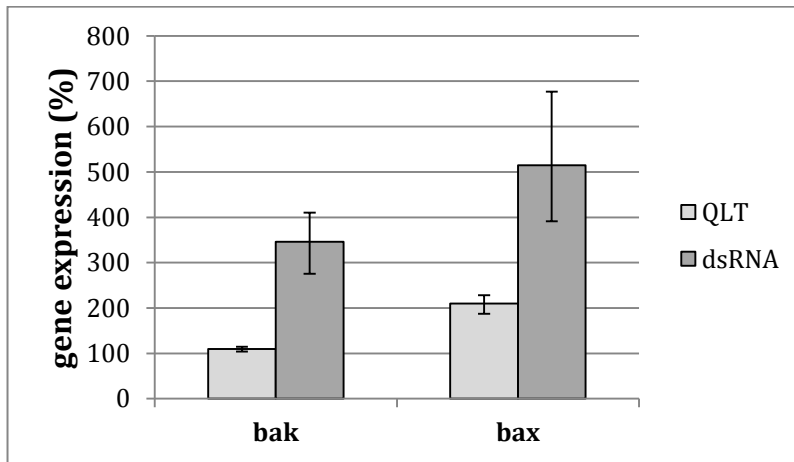

4

5 **B**

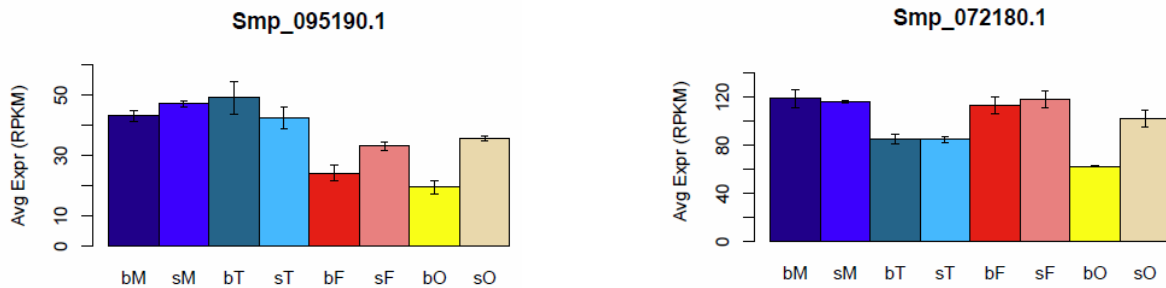

6

7

8 **Suppl. Fig. S7**

9 **A**, qPCR analyses ( $n = 4$ ) of the *S. mansoni* orthologs of the pro-apoptotic genes BAK  
 10 (Smp\_095190) and BAX (Smp\_072180) following treatment with QLT-0267 (left columns,  
 11 light grey) or dsRNA against SmILK (rights columns, grey).

12 **B**, result of a comparative RNA-seq analysis [1] in adults and isolated gonads on the basis  
 13 of normalized, relative expression values (Avg exp (RPKM)) investigating the transcript  
 14 profiles of BAK (left) and BAX (right) in: bM, bisex (paired) males; sM, single-sex (unpaired)  
 15 males; bT, testes from bisex males; sT, testes from single-sex males; bF, bisex (paired)  
 16 females; sF, single-sex (unpaired) females; bO, ovaries from bisex females; sO, ovaries from  
 17 single-sex females (in each case  $n = 3$ , except sO:  $n = 2$ ; [1]). One important finding in the  
 18 context of the paper is that with respect to the expression of both genes sO > bO tendencies  
 19 were found. This reveals an up-regulation of the pro-apoptotic genes BAK and BAX in ovaries  
 20 isolated from unpaired, sexually immature females.

21

22 **References**

- 23 1. Lu Z, Sessler F, Holroyd N, Hahnel S, Quack T, Berriman M, et al. Schistosome sex matters:  
24 a deep view into gonad-specific and pairing-dependent transcriptomes reveals a complex  
25 gender interplay. *Sci Rep.* 201;6: 31150.
