# Supplementary material for: Evidence for Integrin – Venus Kinase Receptor 1 Alliance in the Ovary of Schistosoma mansoni Females Controlling Cell Survival
Source: PLoS Pathog. 2017 Jan 23;13(1):e1006147. doi: 10.1371/journal.ppat.1006147 (PMC5289644; doi:10.1371/journal.ppat.1006147)
Supplement: S1 Table — (DOCX) [file ppat.1006147.s001.docx]

**Supplementary table S1: List of primers used**

| **Names of molecules** | **Purposes** | **Primer names** | **Primer sequences (5´-3´)** |
| --- | --- | --- | --- |
| SmILK | cloning | ILK-*Not*I-fw1  SmILK-2-fwd(*Nco*I) | *GCGGCCGC*ATGGAAACTATTATTGCTCATGTTC  *CCATGG*AAACTATTATTGCTCATGTTC |
|  | ILK-*Xba*I-rev  SmILK-2-rev(*Xma*I) | *TCTAGA*ATTGAGAAGCACGTTCACGC  *CCCGGG*GCTCATTGAGAAGCACGTTCAC |
| SmILK | deletion cloning | SmILK2-Del_ANK1-fwd(*Nco*I  SmILK-2-rev(*Xma*I) | *CCATGG*GTGATGACACAG  *CCCGGG*GCTCATTGAGAAGCACGTTCAC |
| SmILK | ish | ILK-fw4  ILK-rev5 | GAAGGTGAATCATGGGATCCTCG  GCAATATCTTCGTCCACCATTACG |
| SmILK | dsRNA  synthesis | ILK-T7-fw3  ILK-T7-rev4 | *TAATACGACTCACTATAGGGAGA*GAAGGTGAATCATGGGATCCTCG  *TAATACGACTCACTATAGGGAGA*GCAATATCTTCGTCCACCATTACG |
| SmILK | qPCR | qILK-fw  qILK-rev | GGAGCATGTCTTATGCAAG  CCAATCCAGCTTGTATCACG |
| SmPINCH | cloning | PINCH-*Eco*RI-fw  PI-pACT-fwd(*Nco*I)  Pinch-*Xho*I-rev  PI-pACT-rev(BamHI) | *GAATTC*ATGCTTCATGAGGCACG  *CCATGG*AGATGCTTCATGAGGCACG  *TGGAGT*AAGAGTTCCTGTCTTGA  *GGATCC*CTTAATTACTCCATTTTTGTCTATCTGA |
| SmPINCH | deletion cloning | Pinch-Del4Lim-fw  Pinch-Del4Lim-rev | GTCTGTCATATATGCGCGAAAC  TGATACACCAGAACGACTGAAAC |
| SmPINCH | ish | Pinch-si-fw | GTGATCAAGAACTTGGTTTGGATG |
|  | Pinch-si-rev | ATTGCATTGGTAACTTATCATAAC |
| SmPINCH | dsRNA  synthesis | Pinch-T7-fw | *TAATACGACTCACTATAGGGAGA*GTGATCAAGAACTTGGTTTGGATG |
|  | Pinch-T7-rev | *TAATACGACTCACTATAGGGAGA*ATTGCATTGGTAACTTATCATAAC |
| SmPINCH | qPCR | qPinch-fw  qPinch-rev | GTGGTGAAAGCAATGAATCGAAG  GTTTGACAGATATGACAGCCAAC |
| SmNck-2 | cloning | Nck2-*Bam*H1-fw1 | *GGATCC*ACATGATGTCTCATAAAAATACGG |
|  | Nck2-*Xba*1-rev1 | *TCTAGA*AGAAAAACGATTGTGTGGAGCAG |
| SmNck-2 | deletion cloning | NckDEL3SH3-fw  NckDEL3SH3-rev | ACACCACCGACGGCAACTACAAC  ATGTTGCTGTTGCTGACCTTCATG |
| SmNck-2 | ish/qPCR | Nck2-ds-fw  Nck2-ds-rev-2 | ACACTTAATCGGGATGTAAATG  CAAGCAACCTGTACTAGACTG |
| SmNck-2 | dsRNA  synthesis | Nck2-T7-fw  Nck2-T7-rev-2 | *TAATACGACTCACTATAGGGAGA*ACACTTAATCGGGATGTAAATG  *TAATACGACTCACTATAGGGAGA*CAAGCAACCTGTACTAGACTG |
| SmEIF4G1 | qPCR | qSm8900-fw  qSm8900-rev | ACCGCACACGCTGTTGATG  GCAACGGCAAGAACTTCGG |
| SmBAK | qPCR | qSmBak-fw  qSmBak-rev | GCCGACGAACTTCAACTGATATG  CTTCTCATATGTGGCTGACTTG |
| SmBAX | qPCR | qSmBax-fw  qSmBax-rev | CGATGAGAAGTTGAAGAATTGG  GCAAGCCCACCAACATTACG |
| SmmTOR | qPCR | qSmmTOR-fw  qSmmTOR-rev | GAACCACATGGCAATCTCGC  ACACAGTCCAGCAAAGCGTA |
| SmSod | qPCR | qSmSod2-fw  qSmSod2-rev | CAATTGCTGTCCAGGGTTCG  ATGCATGCTCCCAAACGTCG |
|  |  |  |  |

Tm°C, annealing temperature; fw, forward; rev, reverse.; ish, *in situ* hybridization. Recognition sequences for restriction enzymes as parts of some the primer sequences are indicated by italics as well as sequences representing the T7 promoter. Appropriate restriction enzymes (or T7 promotor, respectively) are parts of the primer names given. SmEIF4G1, ortholog of the eukaryotic translation-initiation factor 4 gamma (Smp_008900), which was used as reference gene for qPCR.
